# Supplementary material for: Novel and efficient synthesis of difficult sequence-containing peptides through O–N intramolecular acyl migration reaction of O-acyl isopeptides
Source: Royal Society of Chemistry journal article supplement (doi:10.1039/b312129a), 2003-12-19
Supplement: b312129a.doc [file b312129a.doc]

**Supplementary Information**

**Novel and efficient synthesis of difficult sequence-containing peptides through *O*-*N* intramolecular acyl migration reaction of *O*-acyl isopeptides**

Youhei Sohma, Masato Sasaki, Yoshio Hayashi,* Tooru Kimura, and Yoshiaki Kiso*

Department of Medicinal Chemistry, Center for Frontier Research in Medicinal Science, Kyoto Pharmaceutical University, Yamashina-Ku, Kyoto, Japan. Fax: +81 75 591 9900; Tel: +81 75 595 4635; E-mail: kiso@mb.kyoto-phu.ac.jp

**Fig. 3** HPLC profiles of (A) crude peptide **1** (a) and its *O*-acyl isopeptide **5** (b) (B) crude peptide **6** and its *O*-acyl isopeptide **7** (230 nm).


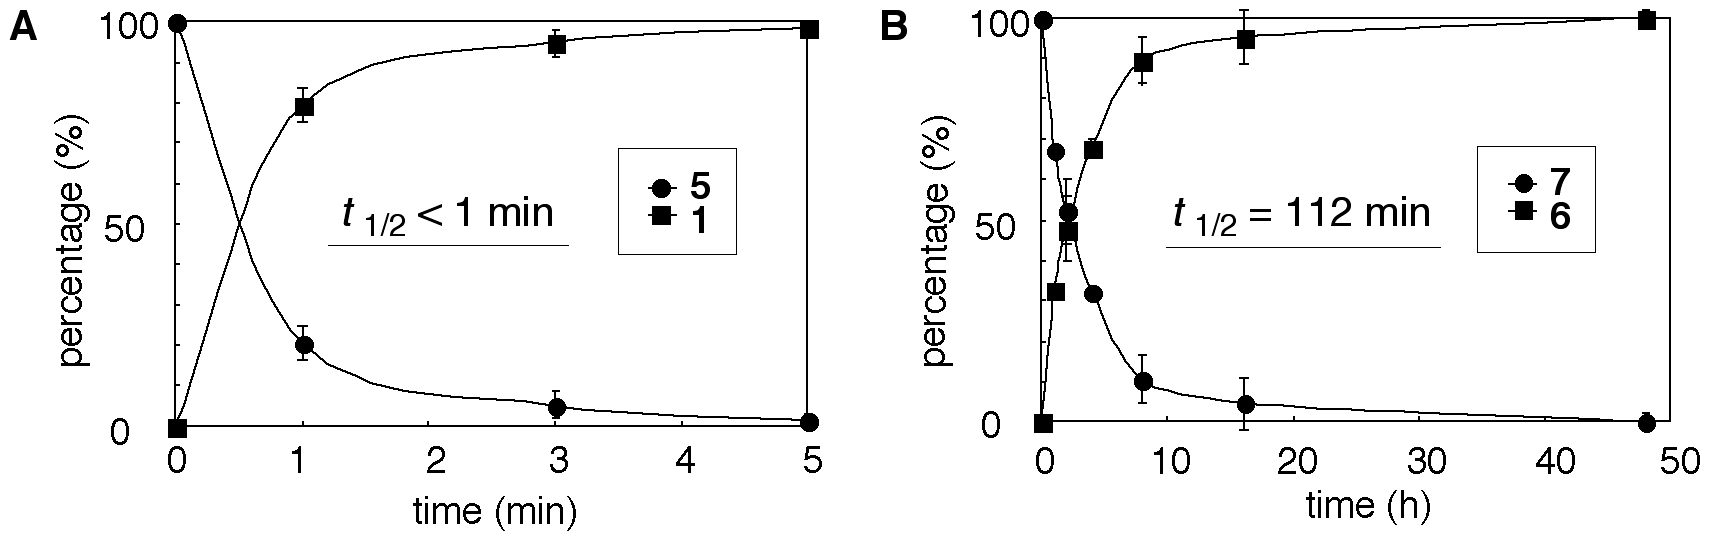
**Fig. 4** Migration of *O*-acyl isopeptide **5** to **1** (A)and **7** to **6** (B) in PBS at pH 7.4 (25 ˚C).

**Fig. 5** Periodical HPLC profile (B) and photographs (C) of conversion of *O*-acyl isopeptide **7** to **6** via *O*-*N* intramolecular acyl migration in PBS (pH 7.4, 25˚C).

**Table 1** Various parameter values of **1** and **6**, and their *O*-acyl isopeptides **5** and **7**

|  | H2O-solubility | |  | MeOH-solubility | |  | DMSO-solubility |  | Half-life*a, c* |  | Overall Yield (%) | |
| --- | --- | --- | --- | --- | --- | --- | --- | --- | --- | --- | --- | --- |
| Compd | mg / mL*a* | Ratio*b* |  | mg / mL*a* | Ratio*b* |  | mg / mL*a* |  | (min) |  | Route A | Route B |
| **1** | 0.008 ± 0.001 | – |  | 0.065 ± 0.019 | – |  | 0.67 ± 0.01 |  | – |  | 6.9 | 57.6 |
| **5** | 59.4 ± 13.6 | 7,425 |  | 277.3 ± 84.2 | 4,266 |  | – |  | < 1 |  | – | – |
| **6** | 0.013 ± 0.005 | – |  | 0.051 ± 0.005 | – |  | 0.64 ± 0.02 |  | – |  | 6.0 | 40.6 |
| **7** | 59.6 ± 32.3 | 4,585 |  | 126.6 ± 50.8 | 2,482 |  | – |  | 112 ± 24.9 |  | – | – |

*a*Values are the means ± SD of three experiments. *b*Ratio = solubility of *O*-acyl isopeptide / solubility of parent peptide. *c*Half-life is the time required for 50% release of parent *N*-acyl peptide in PBS (pH 7.4, 25˚C).

Spectral data for **1**, **5**, **6**, and **7**

**1** by Route A: HRMS (FAB): calcd for C32H53N6O7 (M+H)+: 633.3976, found: 633.3982; HPLC analysis at 230 nm: purity was higher than 98%.

**1** by Route B: HRMS (FAB): calcd for C32H53N6O7 (M+H)+: 633.3976, found: 633.3983; HPLC analysis at 230 nm: purity was higher than 99%.

**5**: HRMS (FAB): calcd for C32H53N6O7 (M+H)+: 633.3976, found: 633.3979; HPLC analysis at 230 nm: purity was higher than 99%.

**6** by Route A: HRMS (FAB): calcd for C25H47N6O7 (M+H)+: 543.3506, found: 543.3510; HPLC analysis at 230 nm: purity was higher than 95%.

**6** by Route B: HRMS (FAB): calcd for C32H53N6O7 (M+H)+: 543.3506, found: 543.3499; HPLC analysis at 230 nm: purity was higher than 96%.

**7**: HRMS (FAB): calcd for C25H47N6O7 (M+H)+: 543.3506, found: 543.3509; HPLC analysis at 230 nm: purity was higher than 99%.
